# Supplementary material
Source: publisher figshare collection journal article supplement (https://acs.figshare.com/ndownloader/files/4193194)

# Confined Rhodium catalyst by self-assembly for asymmetric hydroformylation of unfunctionalized, internal alkenes.

Tendai Gadzikwa, Rosalba Bellini, Henk L. Dekker and Joost N. H. Reek\*

van't Hoff Institute for Molecular Sciences, University of Amsterdam, Science Park 904, 1098 XH, Amsterdam, The Netherlands.

## Materials

All chemicals were used as received from commercial sources. Rh(acac)(CO)<sub>2</sub> (Strem Chemicals Inc.), acetone and methylenechloride (Biosolve B.V.). Toluene was freshly distilled under argon over sodium and kept under Argon.

## Instrumentation

Elemental analysis was performed by Microanalytisches Laboratorium Kolbe (Mülheim an der Ruhr, Germany) after drying under vacuum at room temperature. <sup>1</sup>H NMR and <sup>31</sup>P NMR spectra were recorded on a Varian INOVA 500 NMR spectrometer (500 MHz for <sup>1</sup>H, 125 MHz for <sup>13</sup>C, and 202 MHz for <sup>31</sup>P). <sup>1</sup>H NMR chemical shifts were reported in ppm against residual solvent resonance as the internal standard (δ(acetone) = 2.05 ppm). Gas Chromatography (GC) analyses were performed on a Shimadzu GCT17A instrument (split/splitless injector, J&W Scientific, DBT1 J&W 30 m column, film thickness 3.0 μm, carrier gas 70kPa He, FID Detector). Chiral GC separations were conducted on an Interscience HR GC instrument with a Supelco βTdex 225 capillary column. Electrospray ionization (positive mode) was done with a Q-ToF1 mass spectrometer of Micromass (Waters). Circular dichroism (CD) spectra were recorded on a OLIS DSM-1000 CD-Spectrometer.

## Preparation and Characterization of Supramolecular Structures

Compounds **2**<sup>1</sup> and **3**<sup>2</sup> were prepared via literature procedures.

### 1. Compound 1.

To an Erlenmeyer flask charged with compound **2** (83 mg, 0.16 mmol) and **3** (180 mg, 0.16 mmol), acetone was added until all solids were dissolved. The flask was allowed to sit overnight, at which point red powder/crystals had precipitated out. The solid was collected by filtration, rinsed with acetone, and dried under reduced pressure (224mg, 68 mmol, 85% yield). <sup>31</sup>P NMR (500 MHz, acetone-*d*<sub>6</sub>): δ 144 (s). <sup>1</sup>H NMR (500 MHz, acetone-*d*<sub>6</sub>): δ 9.21 (8H, **3** ArH), 9.08 (2H, **2** ArH), 8.92 (2H, **2** ArH), 8.56 [6H (4H, **3** ArH)+(2H, **2** ArH)], 8.44 (2H, **2** ArH), 8.27 (2H, **2** ArH), 7.92 (2H, **2** ArH), 7.70 (4H, **2** ArH), 7.45 [10H (8H, **3** ArH)+(2H, **2** ArH)], 7.05 (8H, **3** ArH), 7.02 (2H, **2** ArH). EA: Calculated for evacuated **1** (C<sub>196</sub>H<sub>236</sub>N<sub>14</sub>O<sub>12</sub>P<sub>2</sub>Zn<sub>4</sub>): (%) C, 71.26; H, 7.20; N, 5.94. Found: C, 69.44; H, 7.20; N, 5.59.

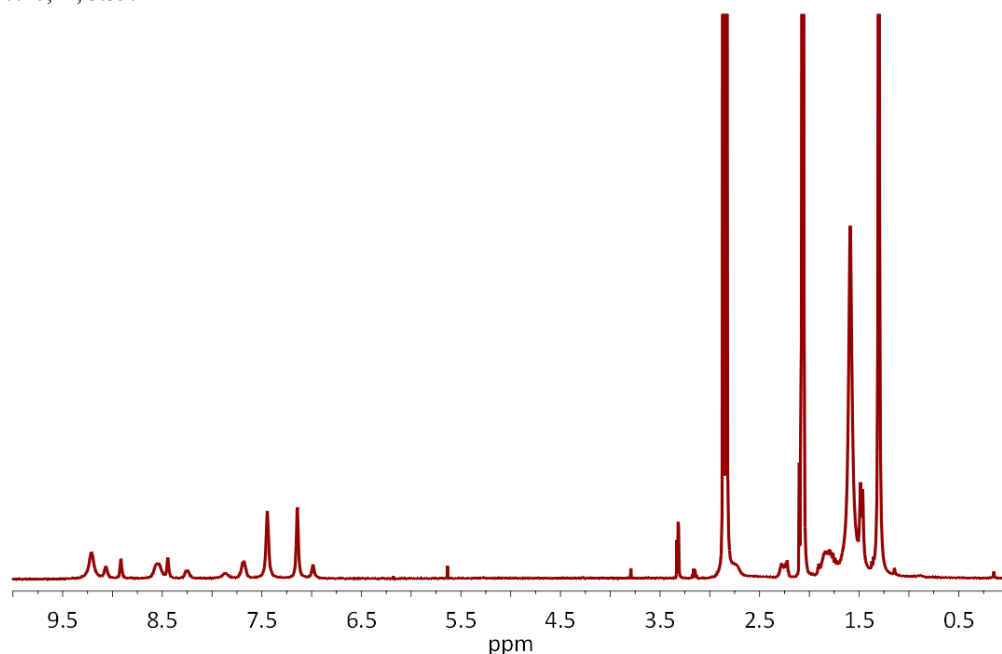

Figure S1. <sup>1</sup>H NMR spectrum of **1**.

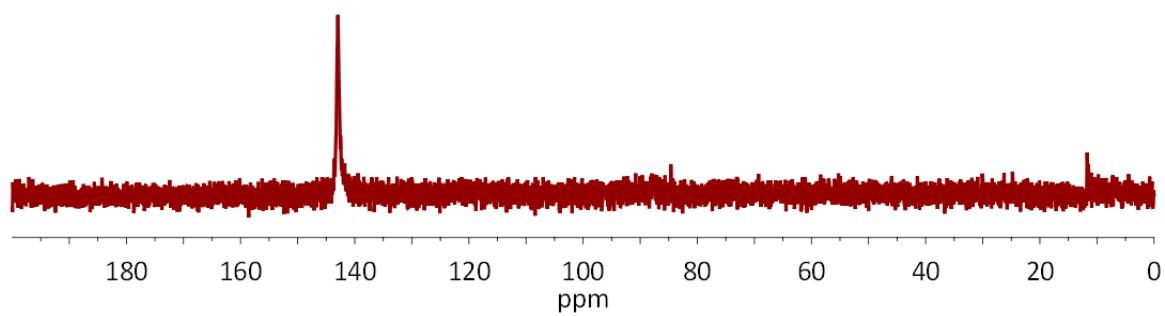

**Figure S2.**  $^{31}\text{P}$  NMR spectrum of **1**.

### Titration of **3** against **2** monitored by CD spectroscopy

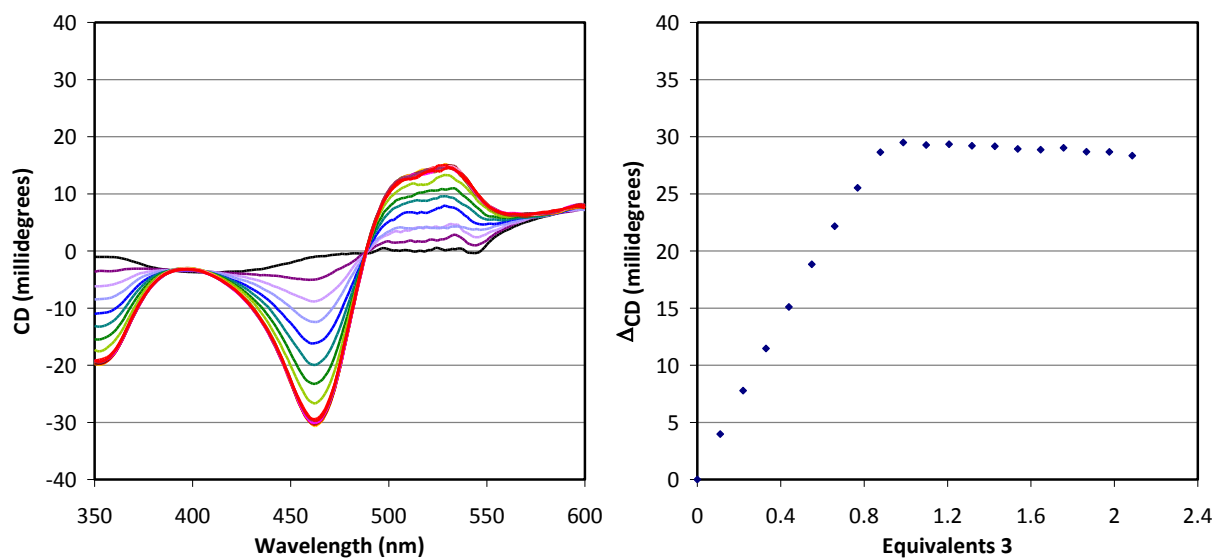

**Figure S3.** CD spectral titration curves for the assembly of **1** (left)  $\Delta\text{mOD } 463.75\text{nm}$  (right). Fixed concentration of **2** ( $2.46 \times 10^{-5}\text{M}$  in acetone), 1.00mm path length quartz cuvette.

## Diffusion NMR data for **1**

The diffusion NMR experiments were carried out using the diffusion bipolar pulse pair stimulated echo (DBPPSTE) method. Measurement of  $T_1$  was carried out before each experiment.  $\Delta = 100$  ms and  $\delta = 2$  ms, and  $T = 298.15$  K. Samples were 8.3 mM in  $d_6$ -acetone.

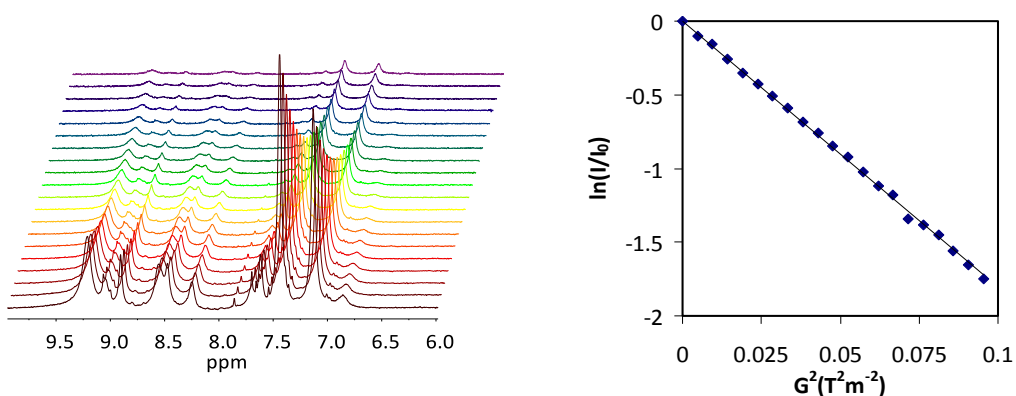

**Figure S4.** A stacked plot of the aromatic area of the  $^1\text{H}$  NMR spectrum of **1** as a function of applied gradient strength (left). A linear fit of the diffusion (right).

$$\ln\left(\frac{I}{I_0}\right) = -18.071G^2 \quad \Rightarrow \quad \left[\gamma^2\delta^2\left(\Delta - \frac{\delta}{3}\right)D\right] = 18.071T^{-2}m^2$$

$$\Rightarrow D = \frac{18.071T^{-2}m^2}{\gamma^2\delta^2\left(\Delta - \frac{\delta}{3}\right)} = \frac{18.071T^{-2}m^2}{\gamma^2\delta^2\left(\Delta - \frac{\delta}{3}\right)} = \frac{18.071T^{-2}m^2}{2.84 \times 10^{10}T^{-2}s} = 6.356 \times 10^{-10}m^2s^{-1}$$

$$r_H = \frac{K_bT}{6\pi\eta D} = \frac{4.12 \times 10^{-21}m^2s^{-2}kg}{4.07 \times 10^{-12}ms^{-2}kg} = \underline{1.01 \times 10^{-9}m}$$

## 2. Compound **1-Rh**.

To a Schlenk flask charged with compound **1** (100 mg, 30  $\mu\text{mol}$ ) and  $\text{Rh}(\text{acac})(\text{CO})_2$  (7.8 mg, 30  $\mu\text{mol}$ ), and equipped with a magnetic stir-bar, distilled toluene (5 mL) was added under a nitrogen atmosphere. The flask was allowed to stir overnight at 80  $^\circ\text{C}$ , after which an unlocked  $^{31}\text{P}$  NMR spectrum of the crude reaction reveals the absence of the singlet corresponding to compound **1**, and the presence of a new doublet. The reaction is then brought to room temperature, and the solvent removed under reduced pressure. The resulting solid was then characterized without further purification.  $^{31}\text{P}$  NMR (500 MHz, acetone- $d_6$ ):  $\delta$  159.5 (d,  $J_{\text{Rh-P}} = 292$  Hz). ESI-MS: Calculated ( $\text{C}_{201}\text{H}_{245}\text{N}_{14}\text{O}_{14}\text{P}_2\text{Rh}_1\text{Zn}_4$ ):  $m/z$  (%) 1752.72 (100.0%), 1752.22 (96.4%), 1753.22 (90.2%). Found: 1752.85, 1752.36, 1753.34.

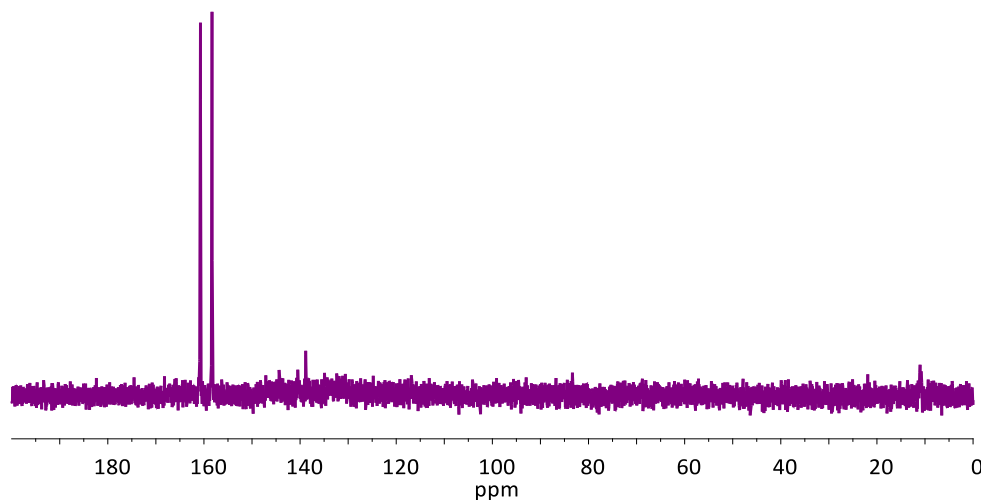

**Figure S5.**  $^{31}\text{P}$  NMR spectrum of **1-Rh**.

### ESI-TOF MS spectra for **1-Rh**

An offline spray was made by filling a glass standard coated Econo10 tip (New Objective) with a solution of the constructed supramolecular complexes in Toluene. Ions visible within the  $m/z$  window of 400-1800 were selected from the ToFMS spectrum. A collision-induced dissociation was performed with the selected ions. Masslynx software was used for the processing of the acquired data and modeling of the isotope pattern.

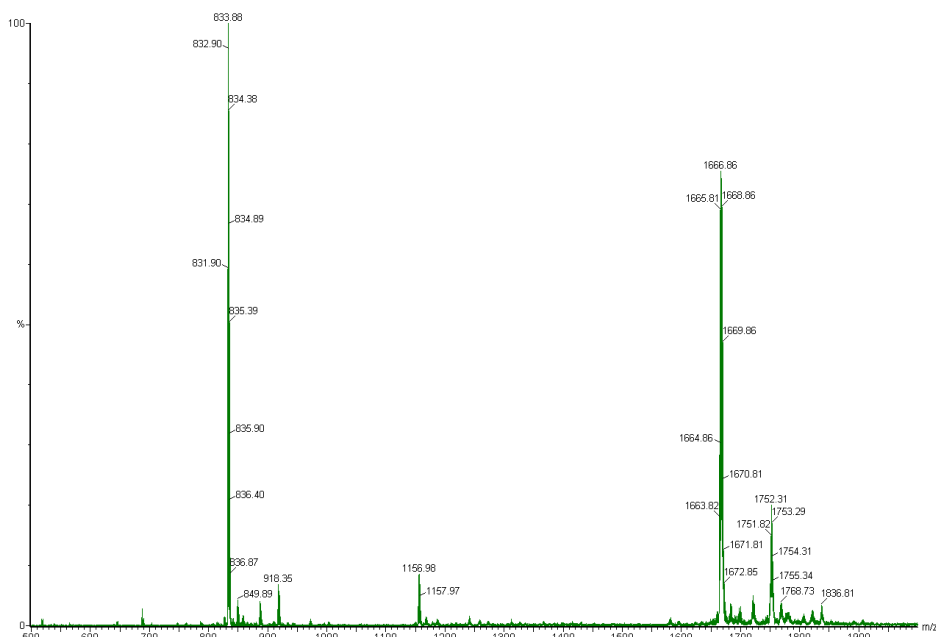

**Figure S6.** ESI-TOF MS of **1-Rh**.

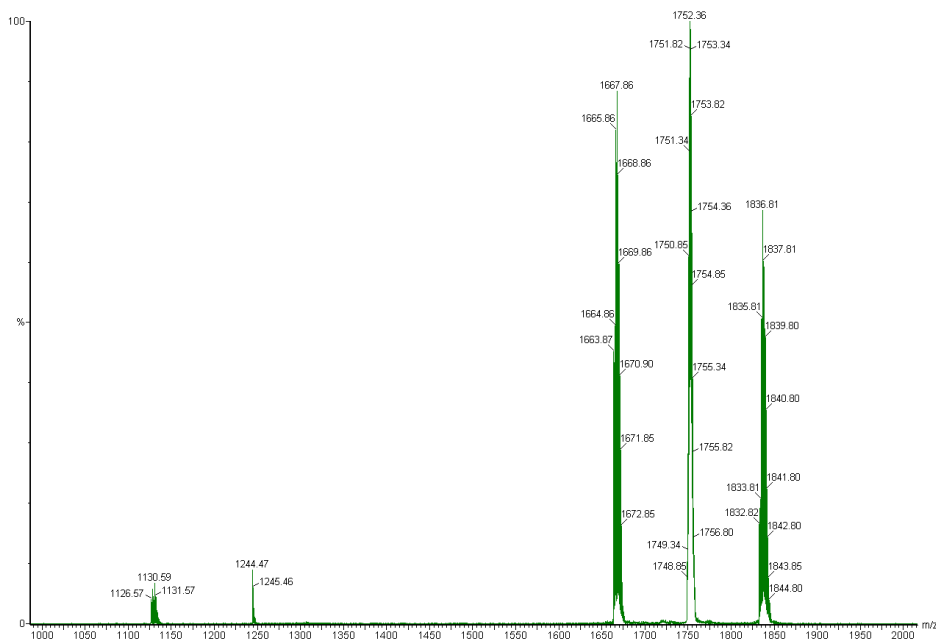

**Figure S7.** MS-MS of ESI-TOF MS peak at 1752 (Figure S6).

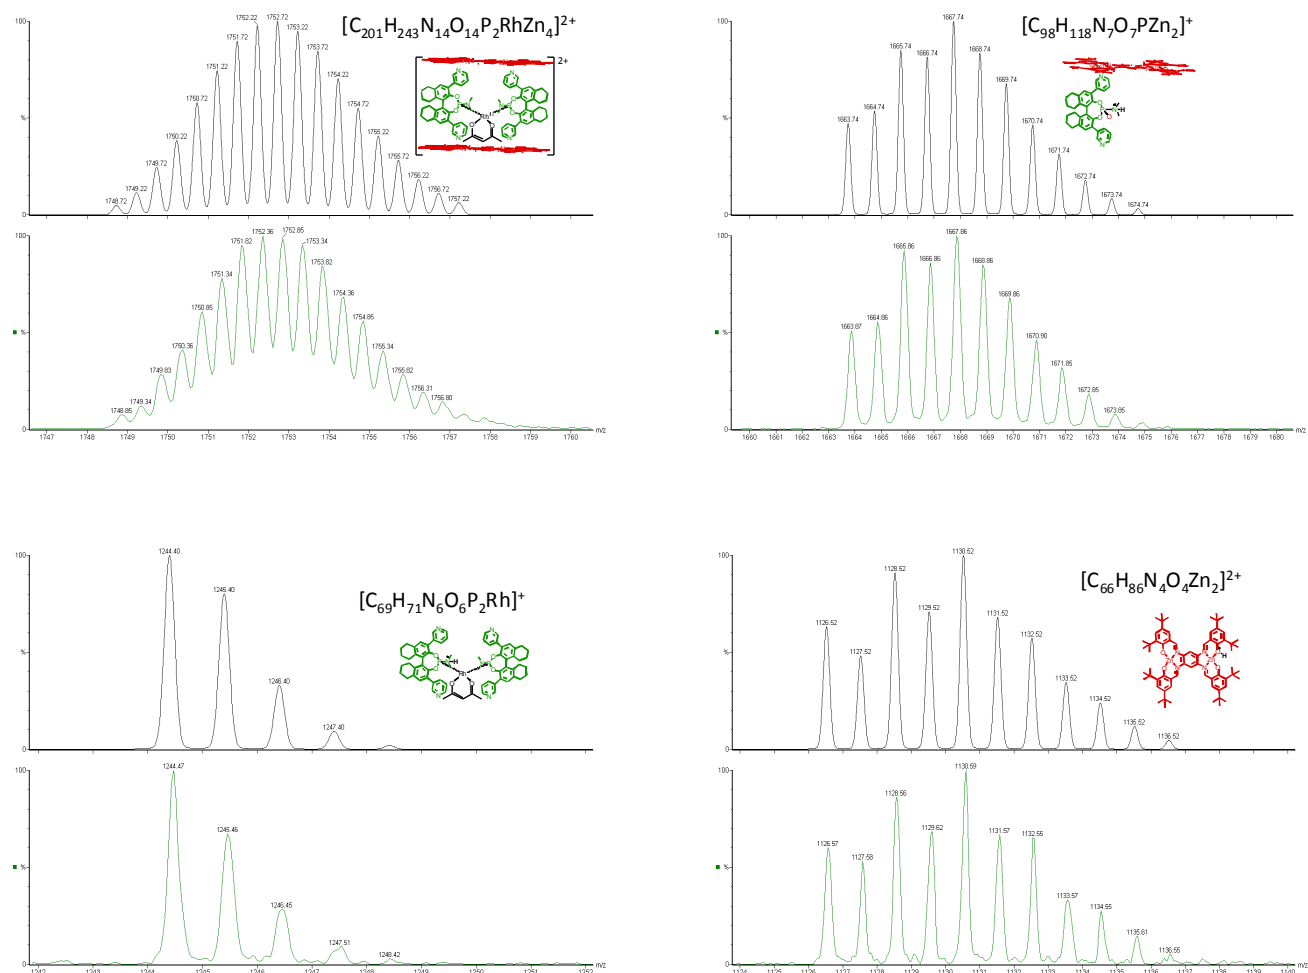

**Figure S8.** Magnification of MS-MS peaks. Black: model calculated in Masslynx. Green: Experimental.

## Computational details

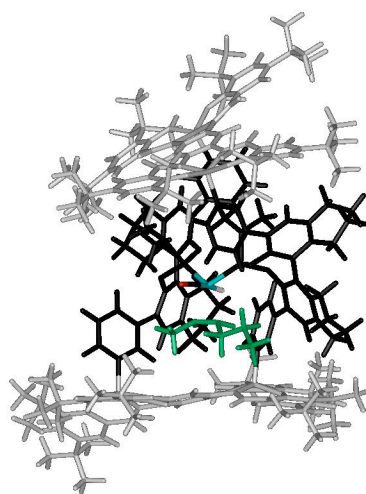

The structure was generated in Spartan 08, using the previously obtained X-ray structure of **2** as a starting point.<sup>2</sup> After generating the structure **1-CORhH-octene**, the assembly was first optimized using constraints on the salen building blocks (**2**), and in the final PM3 optimization no constraints were applied.

## Catalysis Procedures and Results:

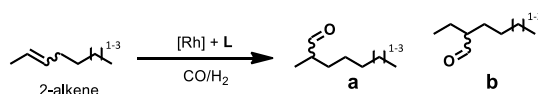

A stainless steel autoclave (150 mL) was fitted with an insert capable of holding multiple GC vials (1.5 mL) to run reactions in parallel. Each vial, equipped with a Teflon stir bar, was charged with the appropriate ligand (9  $\mu\text{mol}$  ligand **2**, 5  $\mu\text{mol}$  all bidentate ligands),  $\text{Rh}(\text{acac})(\text{CO})_2$  (1  $\mu\text{mol}$ ), the substrate (200  $\mu\text{mol}$ ), decane (20  $\mu\text{L}$ ), and then distilled toluene (1 mL) was added, all under ambient conditions. Each vial was then capped with a septum cap, which was then punctured with a needle (25G x  $\frac{5}{8}$ "), which was left piercing through the cap throughout the catalysis. The autoclave was sealed and purged (3 x 10 bar) with syngas ( $\text{H}_2/\text{CO} = 1:1$ ), then pressurized to 20 bar, and the vials left stirring for 84 h. The autoclave was then vented to 1 atm and each reaction quenched with a drop of tri-*n*-butylphosphite. Aliquots were diluted with  $\text{CH}_2\text{Cl}_2$  for GC analysis.

**Table S1.** Evaluation of the substrate scope of ligand **2**.<sup>a</sup>

| Entry | Substrate               | % conv <sup>b</sup> | % inner | er <sup>c</sup>    |
|-------|-------------------------|---------------------|---------|--------------------|
| 1     | <i>trans</i> -2-nonene  | 30                  | 40      | 62:38              |
| 2     | <i>cis</i> -2-nonene    | 37                  | 38      | 52:48              |
| 3     | <i>trans</i> -2-octene  | 22                  | 42      | 61:39              |
| 4     | <i>cis</i> -2-octene    | 35                  | 39      | 48:52              |
| 5     | <i>trans</i> -2-heptene | 24                  | 42      | 59:41              |
| 6     | <i>cis</i> -2-heptene   | 38                  | 39      | 47:53              |
| 7     | <i>trans</i> -3-hexene  | 10                  | na      | 45:55              |
| 8     | <i>cis</i> -3-hexene    | 23                  | na      | 44:56              |
| 9     | 1-octene                | 8                   | 32      | nd                 |
| 10    | styrene                 | 8                   | >99     | 47:53 <sup>d</sup> |

<sup>a</sup>All reactions were performed at 25 °C in toluene with 20 bar 1:1  $\text{CO}/\text{H}_2$ , 0.5 mol %  $\text{Rh}(\text{acac})(\text{CO})_2$ , 2.5 mol % **1** and 84 h reaction time. <sup>b</sup>GC conversions reported. <sup>c</sup>The er values were determined by chiral GC only for the innermost aldehyde. <sup>d</sup>S:R.

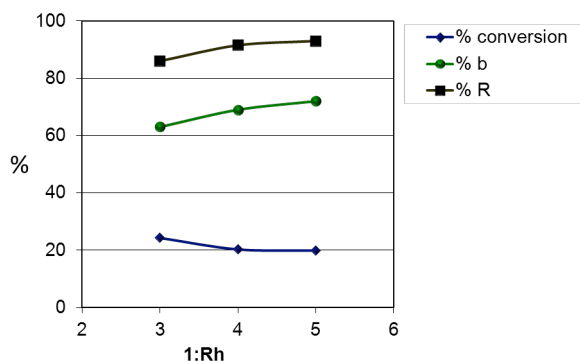

**Chart S1.** Optimization of ligand **1** to Rh ratio.

**Table S2.** High temperature (70°C ) catalysis results for **1**.

| Entry    | Ligand   | Substrate              | % conv | % isomerization products | % <b>b</b> | er <b>b</b> ( <i>R:S</i> ) |
|----------|----------|------------------------|--------|--------------------------|------------|----------------------------|
| <b>1</b> | <b>2</b> | <i>trans</i> -2-octene | 66     | 3                        | 30         | 58:42                      |
| <b>2</b> | <b>2</b> | <i>cis</i> -2-octene   | 79     | 6                        | 27         | 52:48                      |
| <b>3</b> | <b>1</b> | <i>trans</i> -2-octene | 12     | 3                        | 28         | 82:18                      |
| <b>4</b> | <b>1</b> | <i>cis</i> -2-octene   | 20     | 5                        | 40         | 88:12                      |

## Gas chromatography details

Gas Chromatography (GC) analyses were performed on a Shimadzu GCT17A instrument (split/splitless injector, J&W Scientific, DBT1 J&W 30 m column, film thickness 3.0 µm, carrier gas 70kPa He, FID Detector). Initial temp: 70°C, hold 1 min. Ramp 1: 7°C/min to 120°C. Ramp 2: 13°C/min to 250°C, hold 5 min.

**Table S3.** Response factors of alkenes with decane internal standard.

$$\frac{Area_{substrate}}{Area_{decane}} = f \frac{mol_{substrate}}{mol_{decane}}$$

| Substrate               | <i>f</i> |
|-------------------------|----------|
| <i>trans</i> -2-nonene  | 0,9536   |
| <i>cis</i> -2-nonene    | 0,8072   |
| <i>trans</i> -2-octene  | 0,7994   |
| <i>cis</i> -2-octene    | 0,7052   |
| <i>trans</i> -2-heptene | 0,6618   |
| <i>cis</i> -2-heptene   | 0,6257   |
| <i>trans</i> -3-hexene  | 0,4743   |
| <i>cis</i> -3-hexene    | 0,4036   |
| 1-octene                | 0,7461   |
| styrene                 | 0,758    |

Chiral GC separations were conducted on an Interscience HR GC instrument with a Supelco βTdex 225 capillary column. Initial temp: 80°C. Ramp 1: 1°C/min to 95°C. Ramp 2: 40°C/min to 200°C, hold 2 min. GC traces in Appendix.

- (1) Bellini, R.; Chikkali, S. H.; Berthon-Gelloz, G.; Reek, J. N. H. *Angew. Chem. Int. Ed.* **2011**, *50*, 7342-7345.
- (2) Kleij, A. W.; Kuil, M.; Tooke, D. M.; Lutz, M.; Spek, A. L.; Reek, J. N. H. *Chem. Eur. J.* **2005**, *11*, 4743-4750.

## Appendix

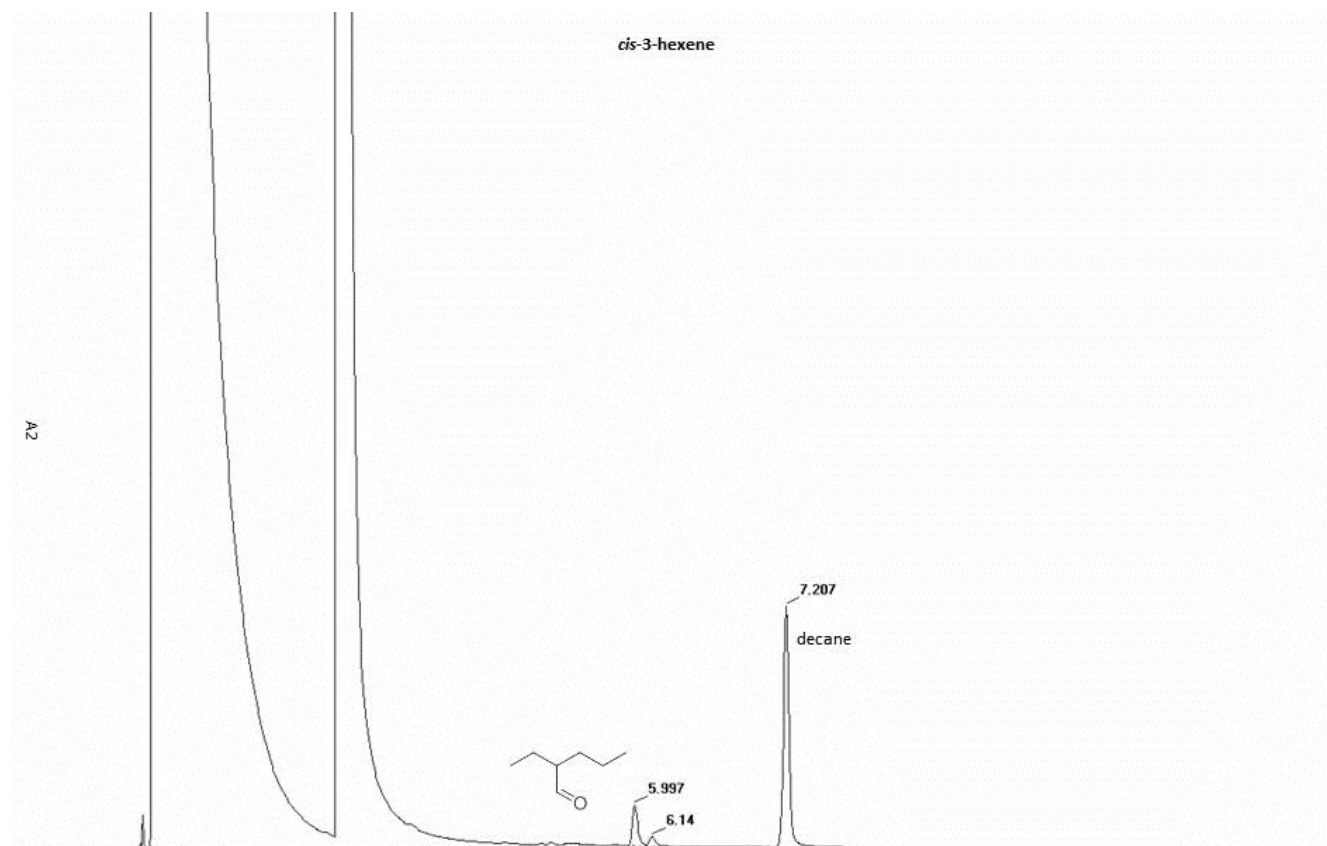



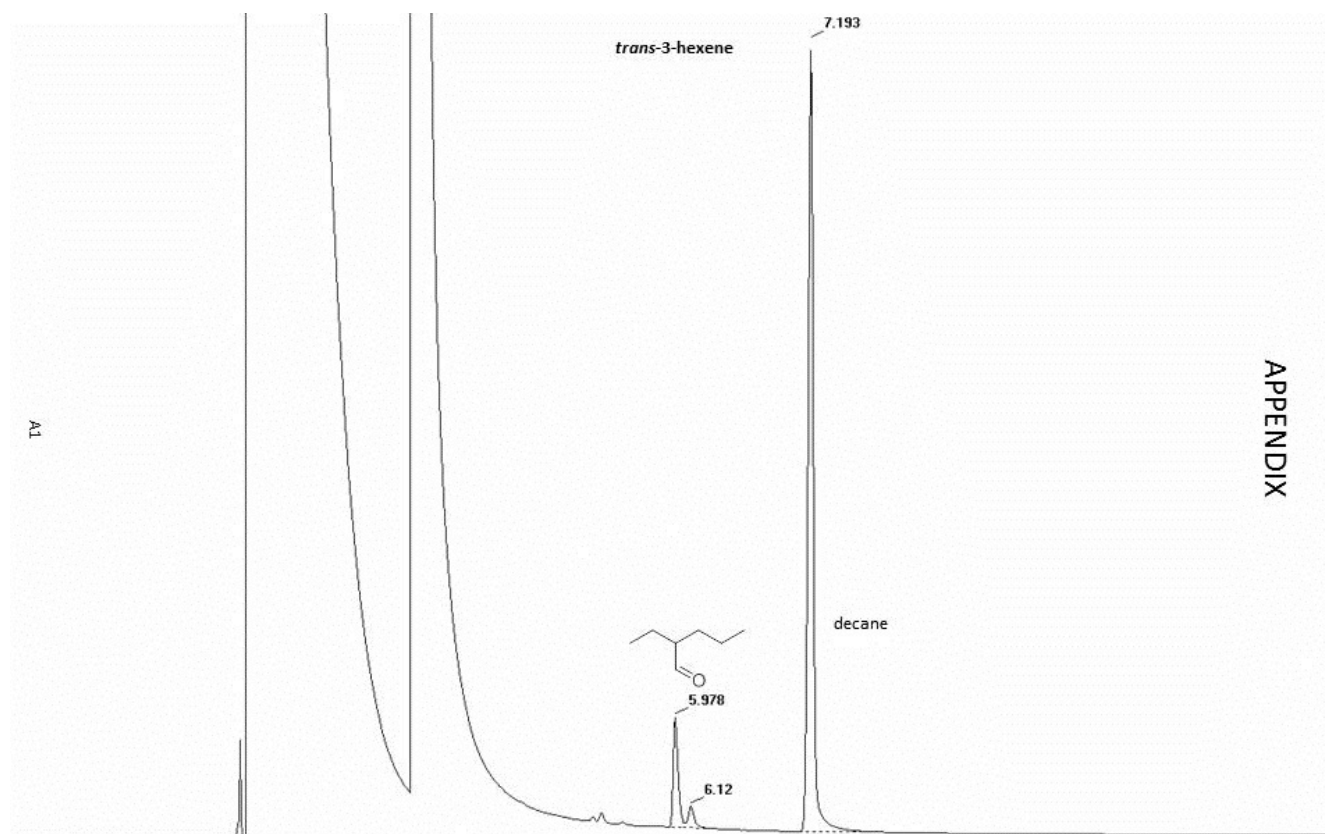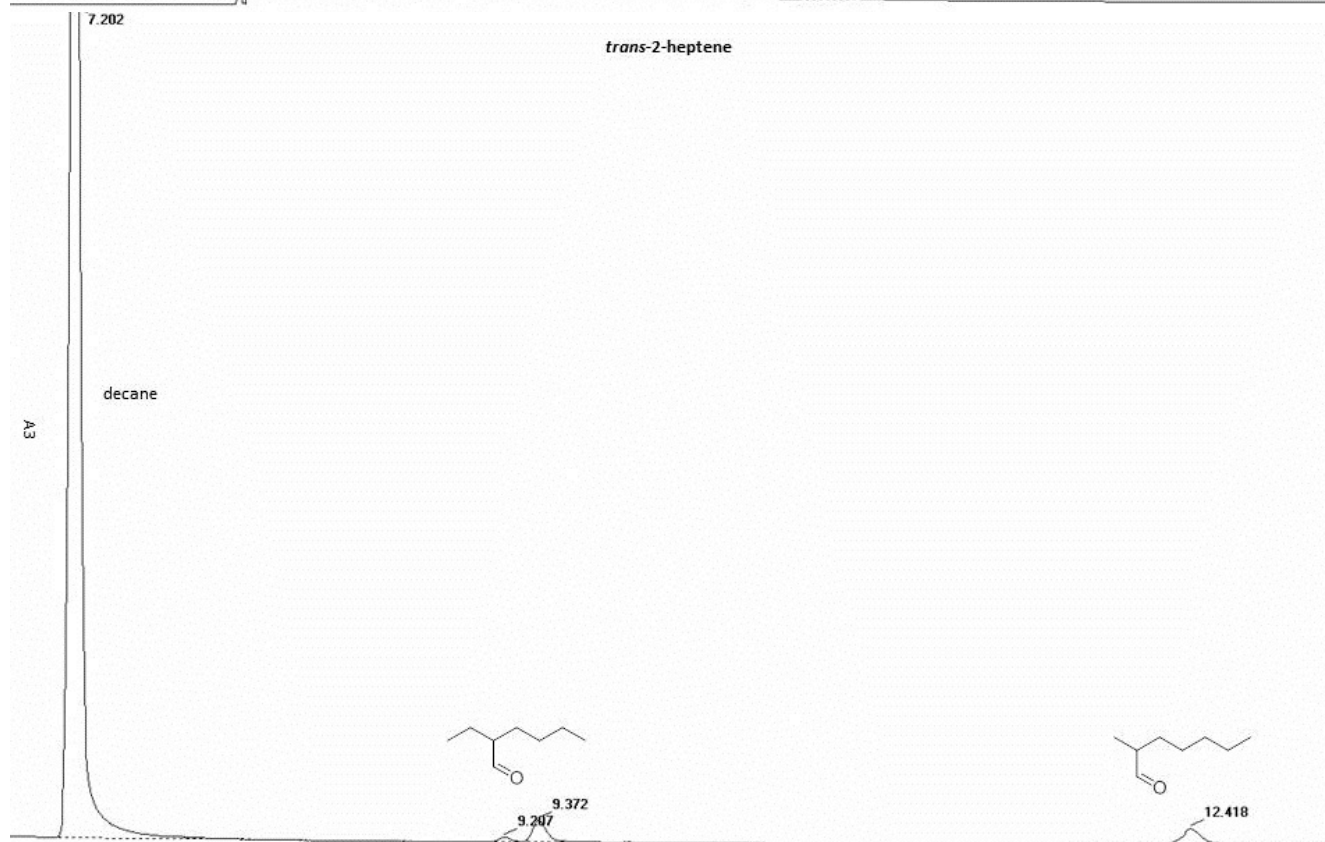

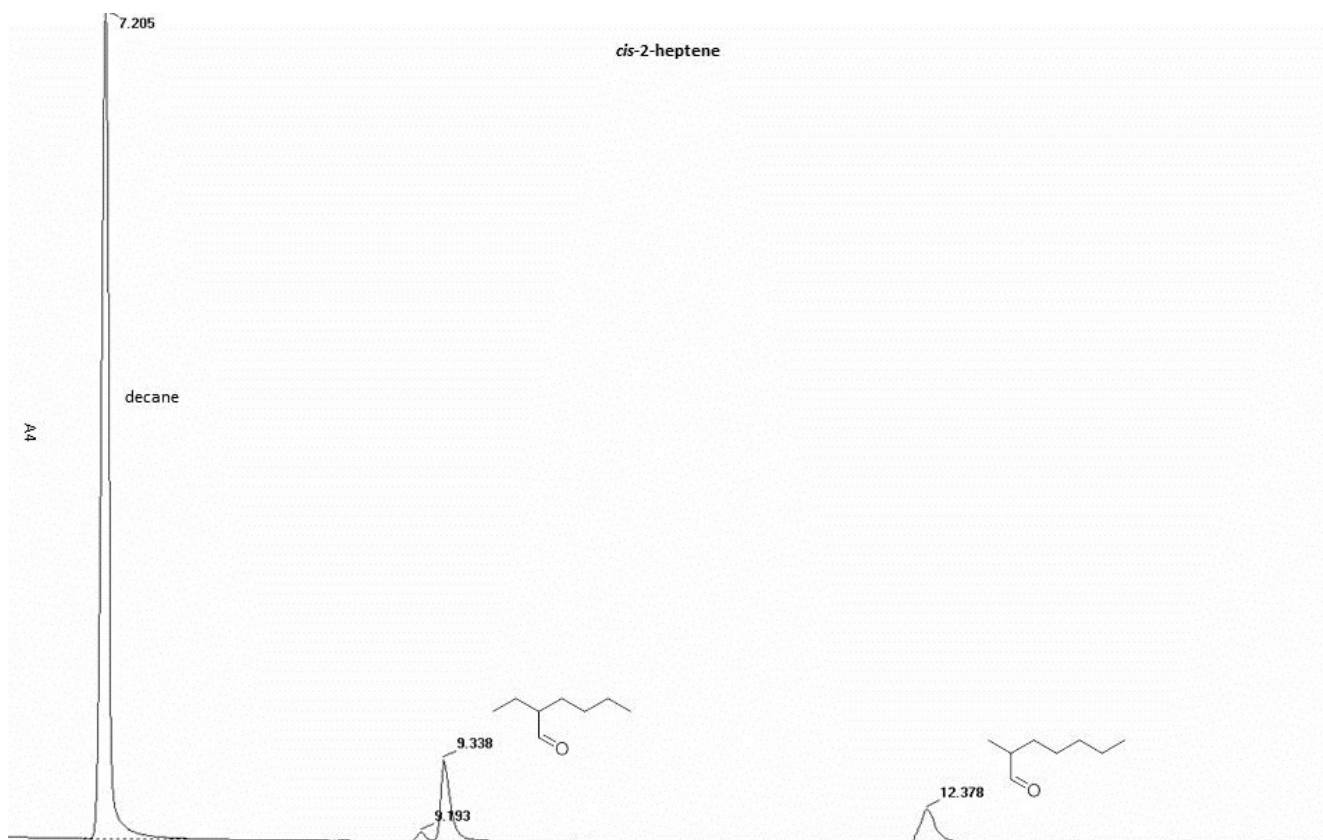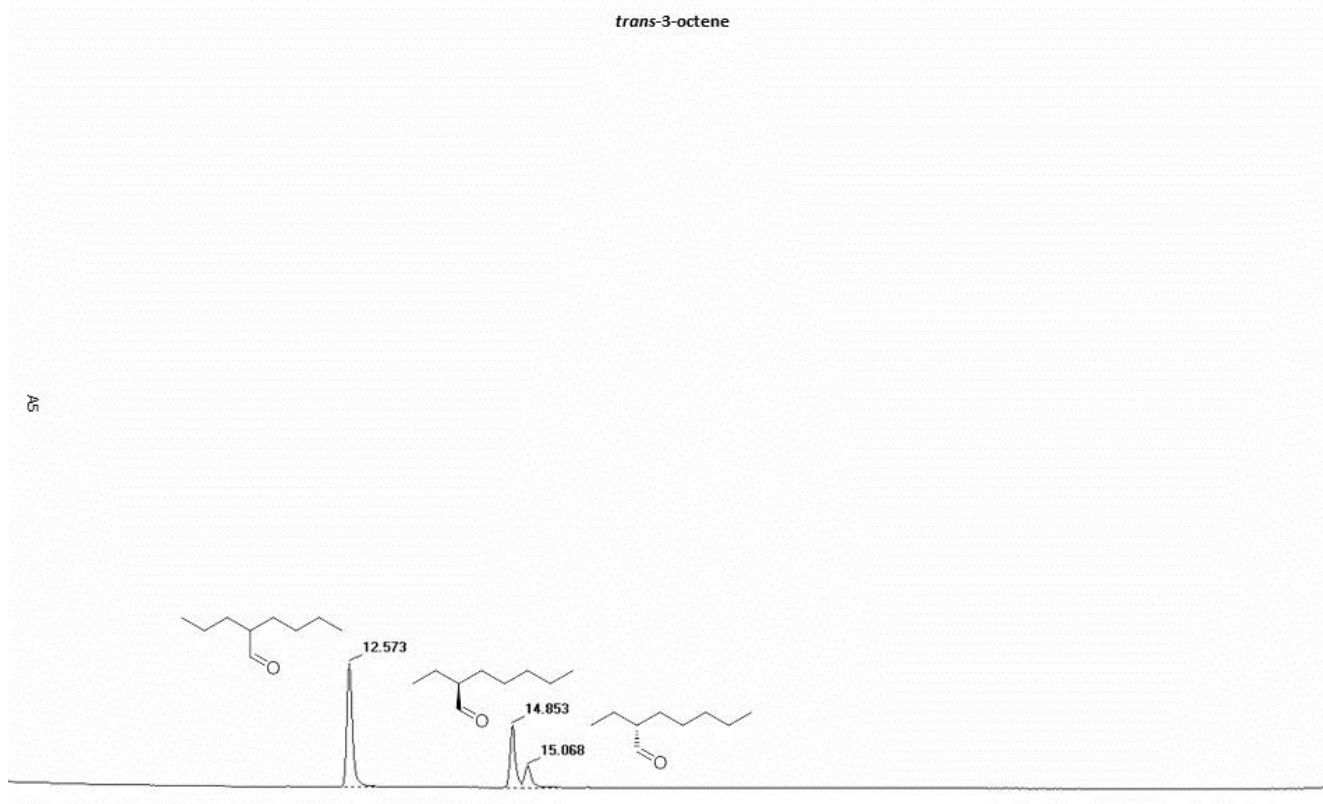

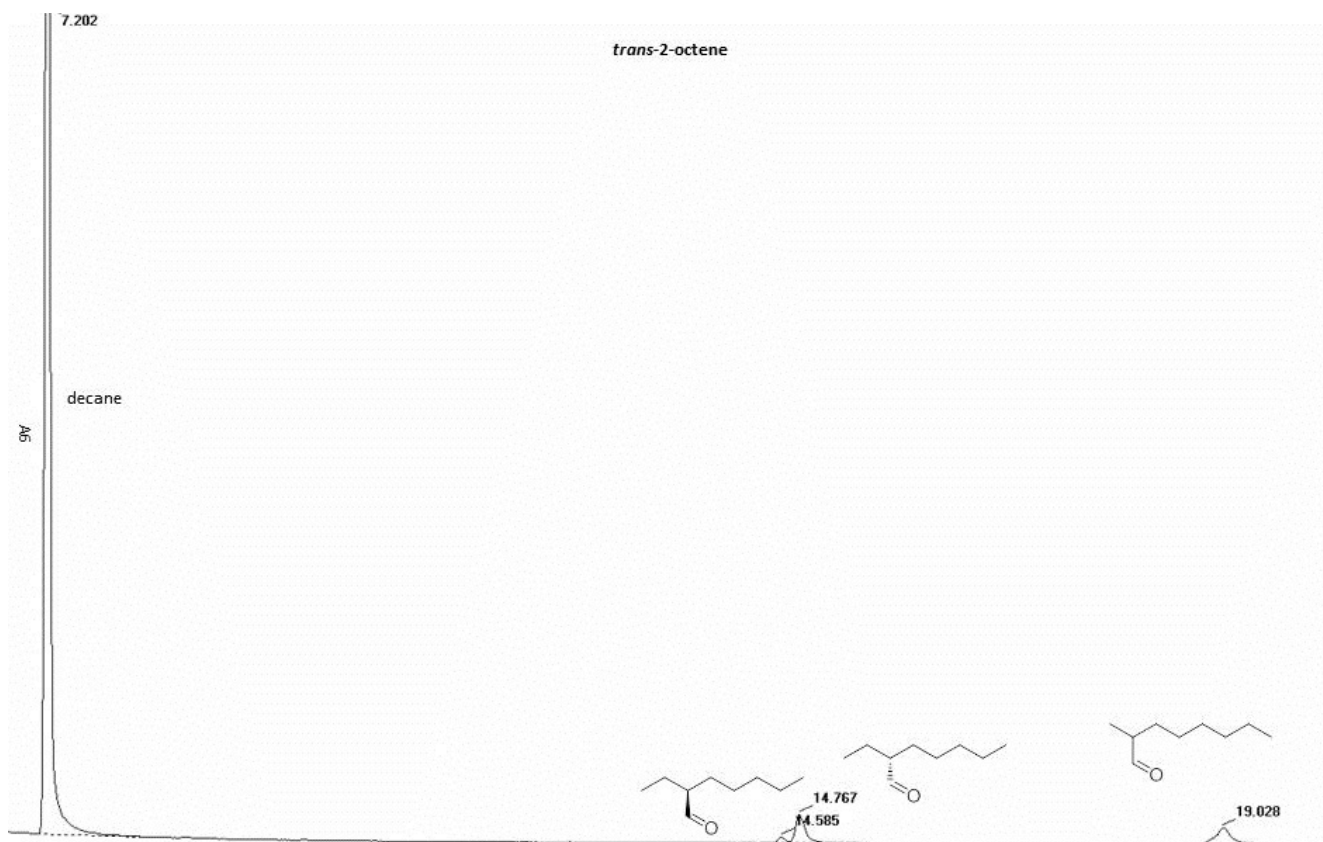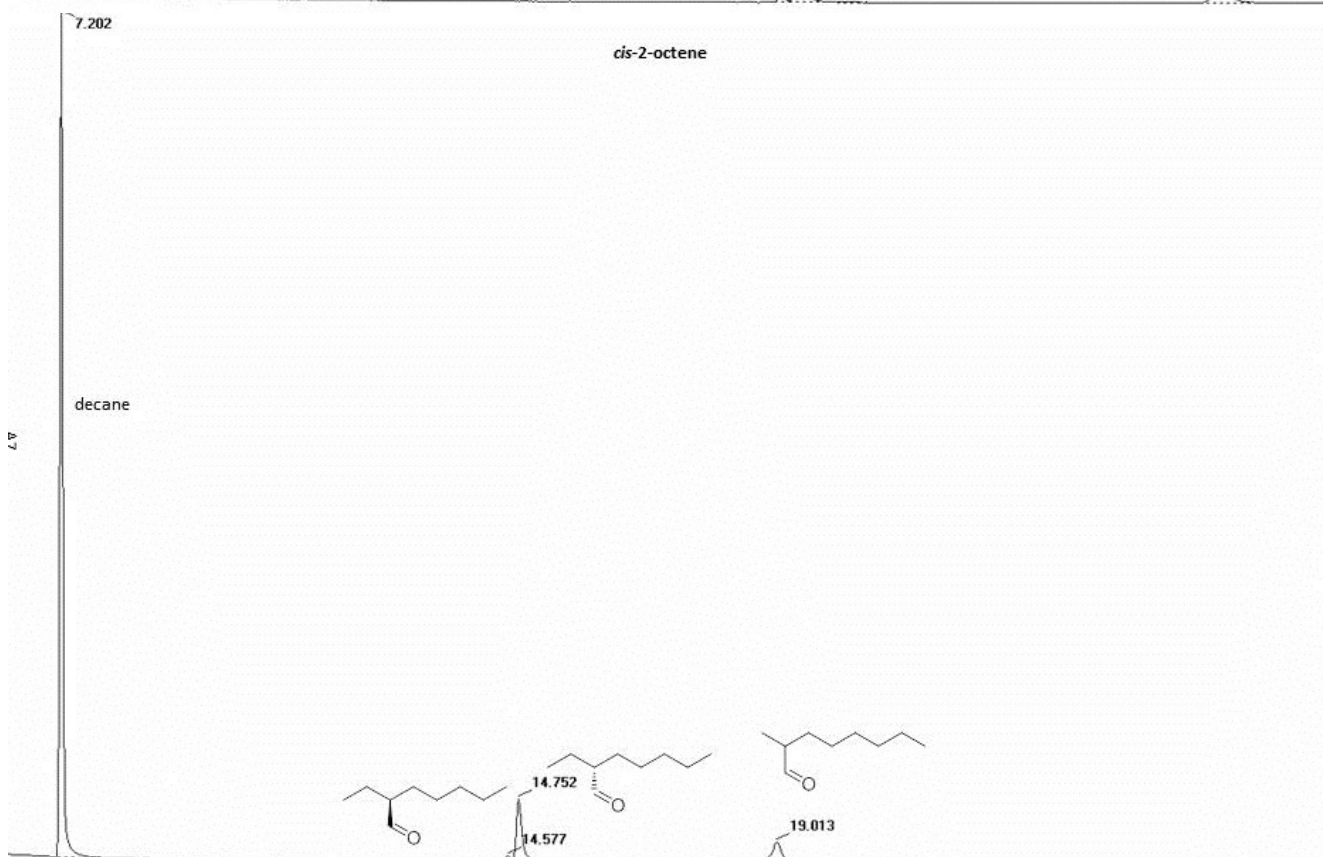

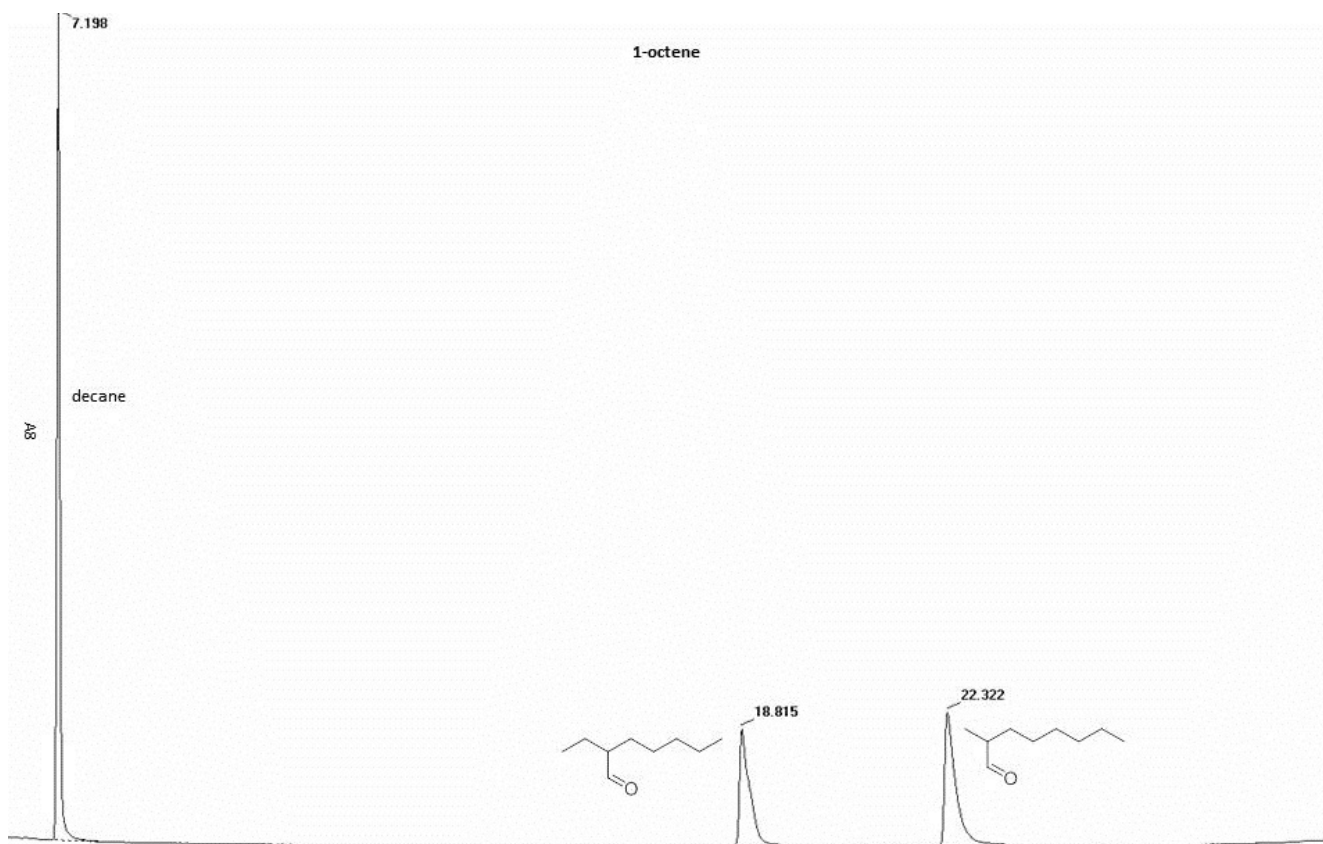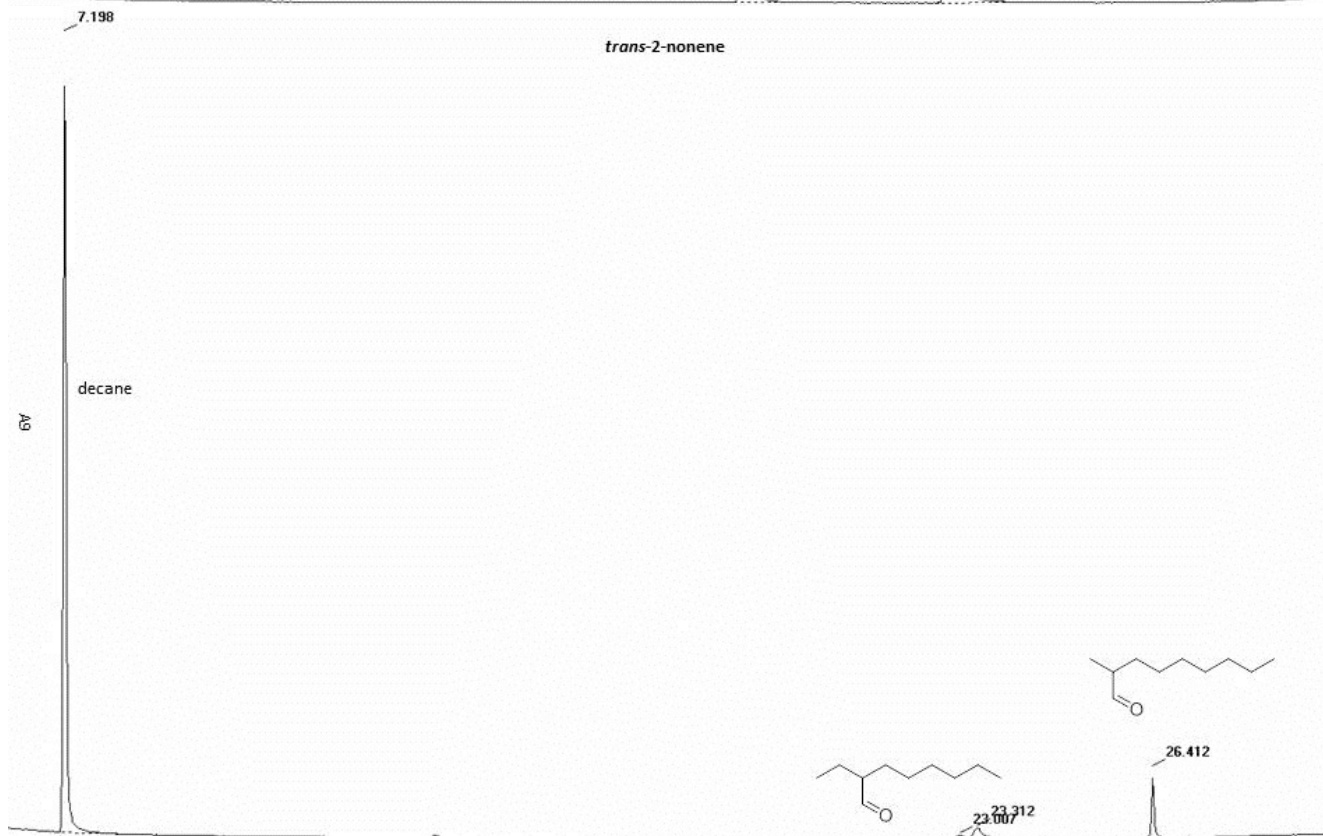

*cis*-2-nonen

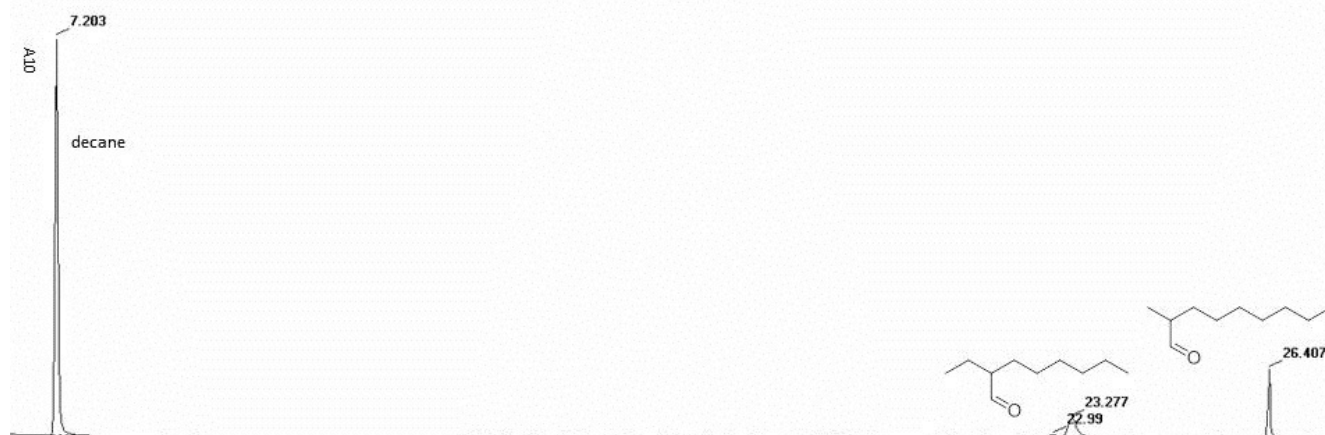

styrene

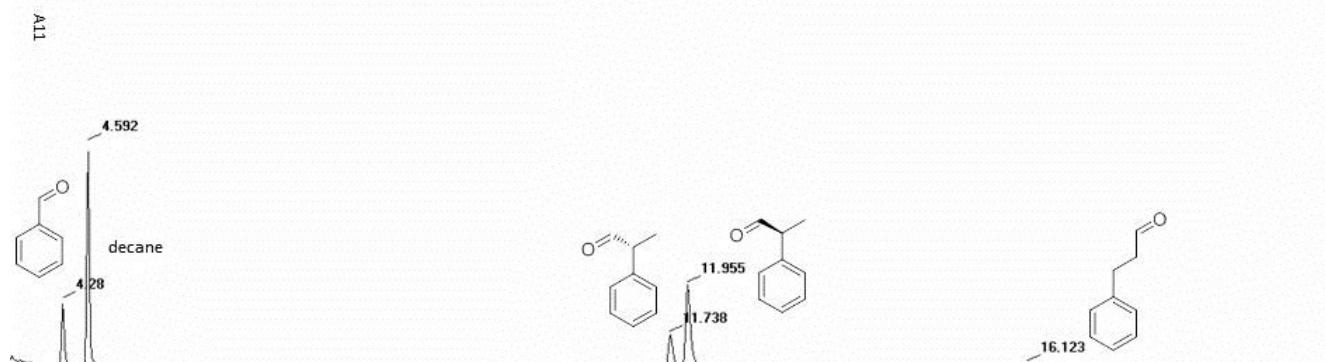

Supplement: Supplementary file 1 [file 4193194]
